## **Changing environments and genetic variation: inbreeding does not compromise short-term physiological responses**

James Buckley<sup>1,2</sup>, Rónán Daly<sup>3</sup>, Christina Cobbold<sup>4</sup>, Karl Burgess<sup>3</sup>, and Barbara K. Mable<sup>1</sup>

<sup>1</sup> Institute of Biodiversity, Animal Health and Comparative Medicine, College of Medical, Veterinary and Life Sciences, University of Glasgow, Glasgow, UK, G12 8QQ

<sup>2</sup> Center for Adaptation to a Changing Environment, Institute of Integrative Biology, ETH Zürich, Zürich, Switzerland, CH-8092

<sup>3</sup> Institute of Cell, Molecular and Systems Biology, College of Medical, Veterinary and Life Sciences, University of Glasgow, Glasgow, UK, G12 8QQ

<sup>4</sup> School of Mathematics and Statistics, University of Glasgow, Glasgow, UK

**Corresponding author:** Email: [james.buckley@env.ethz.ch](mailto:james.buckley@env.ethz.ch), Telephone: +41-44-633 8109)

**Coauthors:** [ronan.daly@glasgow.ac.uk](mailto:ronan.daly@glasgow.ac.uk), [christina.cobbold@glasgow.ac.uk](mailto:christina.cobbold@glasgow.ac.uk), [karl.burgess@glasgow.ac.uk](mailto:karl.burgess@glasgow.ac.uk), [barbara.mable@glasgow.ac.uk](mailto:barbara.mable@glasgow.ac.uk)

Total word count (main text, including acknowledgements) = 8732

Running heading: Natural inbreeding does not alter physiological plasticity

## 1 ABSTRACT

- 2 • Selfing plant lineages are surprisingly widespread and successful in a broad range of  
3 environments, despite showing reduced genetic diversity, which is predicted to  
4 reduce long-term evolutionary potential. However, short-term capacity to respond  
5 appropriately to new conditions might not require high levels of standing genetic  
6 variation. The purpose of this study was to directly test whether mating system  
7 variation and its associated changes in genetic variability in natural populations  
8 affected responses to short-term environmental challenges.
- 9 • We compared relative fitness and metabolome profiles of naturally outbreeding  
10 (genetically diverse) and inbreeding (genetically depauperate) populations of a long-  
11 lived perennial plant, *Arabidopsis lyrata*, under constant growth chamber conditions  
12 and an outdoor common garden environment outside its native range.
- 13 • We found no effect of mating system on survival or reproductive output, although  
14 several phenological traits showed different associations with latitude for  
15 outcrossing and inbreeding populations. Natural inbreeding had no effect on the  
16 plasticity of physiological responses, using either multivariate approaches or  
17 analysis of variation in individual metabolites. Moreover, while both growing  
18 environment and time significantly affected the relative abundance of individual  
19 metabolites, inbreeding populations responded similarly to outbreeding populations,  
20 suggesting adaptation to the outdoor environment, regardless of mating system.
- 21 • We conclude that low genetic diversity in naturally inbred populations may not  
22 compromise fitness or short-term capacity for appropriate physiological responses  
23 to environmental change. The absence of natural costs of inbreeding could help to  
24 explain the global success of clonal or asexual mating strategies for adapting to a  
25 wide range of environments.

26

27 **Key words:** *Arabidopsis lyrata*, inbreeding, mating system, selfing, genetic variation,  
28 metabolomics, physiology, plasticity

## 29 INTRODUCTION

30 Genetically informed conservation management programmes often assume that  
31 adaptive potential is limited by the amount of additive genetic variation maintained in a  
32 population (O'Brien, 1994; Hoffmann, Sgro, and Kristensen, 2017). However, many  
33 geographically widespread and invasive plant species are self-fertilising or asexually  
34 reproducing and the evolutionary transition from an outcrossing to a selfing mating system  
35 has occurred frequently (e.g. Igic, Lande, and Kohn, 2008; Razanajatovo et al., 2016).  
36 Such shifts are associated with increased genome-wide homozygosity, as well as reduced  
37 efficacy of purifying and positive selection (e.g. Wright, Kalisz, and Slotte, 2013).  
38 Inbreeding is thus thought to compromise long-term evolutionary potential through erosion  
39 of genetic variation and increase the risk of extinction through inbreeding depression,  
40 defined as the exposure of deleterious recessive mutations through increased homozygosity  
41 (Charlesworth and Charlesworth, 1987; Keller and Waller, 2002). Consistent with this,  
42 selfing lineages are predicted to show higher extinction rates than related self-incompatible  
43 lineages (Goldberg et al., 2010). Together, these lines of evidence support the view that the  
44 long-term potential to adapt to environmental change will be compromised in low diversity  
45 selfing (inbred) lineages, compared to higher diversity outcrossed lineages (Bijlsma and  
46 Loeschcke, 2012; Wright, Kalisz, and Slotte, 2013).

47 However, multiple lines of evidence suggest that low levels of genetic variation  
48 associated with selfing may not affect the ability of lineages to respond appropriately to  
49 shorter-term environmental change. Firstly, many highly self-fertilising or asexually  
50 reproducing plants (modes of reproduction that reduce genetic variation) show broad  
51 distributions, and are able to invade and colonise new locations (Barrett, Colautti, and  
52 Eckert, 2008; van Kleunen et al., 2008; Razanajatovo et al., 2016). There are multiple  
53 examples of self-fertilising species rapidly colonising and adapting to new environments  
54 (Colautti et al., 2017; Willoughby et al., 2018), despite starting with low levels of genetic  
55 diversity. Secondly, low levels of neutral genetic variation may not always equate to low

56 levels of adaptive genetic variation, and therefore may be a poor proxy for the evolutionary  
57 potential of a population (Whitlock, 2014). The loss of individual selfed or clonal lineages  
58 with a high genetic load can also reduce the impacts of inbreeding depression at the  
59 population-level (Keller and Waller, 2002; Hedrick and Garcia-Dorado, 2016). Finally,  
60 selfing has obvious advantages when reproducing in a new environment where  
61 conspecifics are scarce (Eckert et al., 2010), but few studies have directly tested the effects  
62 of the resulting low additive genetic variation on short-term physiological plasticity.

63 Experimental laboratory studies suggests that the negative effects of inbreeding on  
64 trait plasticity may be strongest under stressful environments (Bijlsma and Loeschcke,  
65 2012). For example, artificially inbred families or experimental lines show reduced  
66 survival under extreme temperature stress (Kristensen et al., 2008), reduced tolerance to  
67 herbivores (Ivey, Carr, and Eubanks, 2004), and reduced induction of anti-predator or anti-  
68 herbivore defense traits (Auld and Relyea, 2010; Campbell, Thaler, and Kessler, 2012;  
69 Kariyat et al., 2012; Campbell et al., 2014; Swillen, Vanoverbeke, and De Meester, 2015).  
70 However, in other experiments, the effects of inbreeding on trait plasticity were either not  
71 observed (Schlichtling and Levin, 1986), or varied among traits and were not consistent  
72 across inbred families (Ivey, Carr, and Eubanks, 2004; Schou, Kristensen, and Loeschcke,  
73 2015). So, even in a context of experimental inbreeding in normally outcrossing species  
74 (when inbreeding depression should be high), short-term responses might not always be  
75 compromised by reduced heterozygosity or diversity in inbred lineages.

76 Recent work on the molecular basis of inbreeding effects on plasticity has revealed  
77 altered gene expression patterns associated with artificially inbred lines, as well as  
78 interactive effects of environmental stress and inbreeding on gene expression (Kristensen  
79 et al., 2010; Paige, 2010). Inbred *Drosophila* lines exposed to temperature stress showed  
80 increased variance in metabolite profiles relative to outcrossed lines, as well as consistent  
81 effects of inbreeding on particular metabolites (Pedersen et al., 2008). Similarly,  
82 experimentally inbred plant families (*Solanum carolinense*) showed reduced expression of

83 anti-herbivore defensive metabolites (Campbell, Thaler, and Kessler, 2012). Thus, it seems  
84 clear that an initial shift from outcrossing to inbreeding could compromise appropriate  
85 metabolic responses to stressors through inbreeding depression. However, most studies  
86 have compared the consequences of artificially-induced inbreeding, or mating system  
87 variation between species, rather than within species. We know far less about how  
88 populations with a sufficiently long history of inbreeding to purge deleterious recessive  
89 mutations will be able to adapt to changing environmental conditions, despite reduced  
90 levels of genetic variation compared to their outcrossing relatives.

91 To test how natural mating system variation within a species impacts physiological  
92 responses to abrupt environmental change we used *Arabidopsis lyrata*, a predominantly  
93 outcrossing perennial herb that shows natural variation in mating system around the Great  
94 Lakes region in North America (Mable et al., 2005; Mable and Adam, 2007; Foxe et al.,  
95 2010). Inbreeding populations, in which the majority of individuals are capable of self-  
96 fertilisation, show significantly reduced heterozygosity and genetic diversity relative to  
97 outcrossing populations (Foxe et al., 2010; Buckley et al., 2016), although they show only  
98 minor changes in floral morphology consistent with the evolution of a selfing phenotype  
99 (Carleial, van Kleunen, and Stift, 2017b). Populations around the Great Lakes occupy  
100 several distinct habitats (rocky alvar and sand dune) and are distributed across a broad  
101 latitudinal gradient, characterised by variation in climate and the length of the growing  
102 period, so are also an interesting system in which to study local adaptation and its  
103 interaction with mating system. Patterns of population genetic structure suggest that the  
104 loss of self-incompatibility arose multiple times during several independent postglacial  
105 colonisations of the North American Great Lakes region (Hoebe, 2009; Foxe et al., 2010).

106 Experimentally-induced inbreeding in outcrossing *A. lyrata* populations from  
107 Europe has been found to result in strong inbreeding depression in growth and  
108 germination-related traits, as well as changes to constitutive patterns of gene expression  
109 under stable environmental conditions (Sletvold et al., 2013; Stift et al., 2013; Menzel et

110 al., 2015). In contrast, experimentally-inbred North American outcrossing populations  
111 show more subtle fitness reductions (Stift et al., 2013) and show surprisingly few  
112 differences compared to geographically proximate inbreeding populations. While naturally  
113 inbreeding populations from North America showed significantly reduced germination  
114 rates compared to closely-related outcrossing populations, no inbreeding depression was  
115 found for seedling growth rates or induced defense responses when challenged with  
116 herbivores for either mating system type (Joschinski, van Kleunen, and Stift, 2015;  
117 Carleial, van Kleunen, and Stift, 2017a). Moreover, inbreeding load has been found to be  
118 low and not substantially different in naturally inbreeding and outcrossing populations  
119 from North America, although the former show a greater increase in fitness when crossed  
120 to other populations (Willi, 2013). Similarly, in common garden experiments using  
121 experimental crosses between populations, heterosis was found to be higher in inbred  
122 compared to outcrossed populations, but magnitudes of inbreeding depression were similar  
123 regardless of mating system (Oakley, Spoelhof, and Schemske, 2015). North American  
124 populations of *A. lyrata* show a substantial reduction in genetic diversity compared to  
125 European populations, suggestive of a historical bottleneck (Ross-Ibarra et al., 2008;  
126 Mattila et al., 2017), but also that there has been some purging of the genetic load in both  
127 outcrossing and inbreeding populations (Stift et al., 2013; Willi, 2013). *Arabidopsis lyrata*  
128 is therefore a good model to assess the impacts on adaptive potential of loss of genetic  
129 diversity within a species caused by inbreeding without being overwhelmed by large  
130 differences in inbreeding depression in relation to mating system. Previous physiological  
131 studies in *A. lyrata* have revealed extensive variation in metabolite profiles among  
132 populations from different geographic regions (Davey et al., 2008; Kunin et al., 2009), as  
133 well as divergence in cold tolerance responses among regions (Davey, Woodward, and  
134 Quick, 2008), but these analyses were restricted to outcrossing populations from Europe.  
135 An important gap in our knowledge is thus whether natural variation in levels of

136 inbreeding and genetic diversity affects short-term physiological responses to  
137 environmental change.

138         The purpose of this study was to test whether naturally inbred populations show  
139 reduced fitness and altered physiological responses in a common garden environment  
140 when compared to outbred populations. The common garden environment was situated  
141 outside the native range of *A. lyrata* and therefore provided growing conditions that  
142 differed from those naturally experienced. Specifically, we asked: 1) Is inbreeding  
143 associated with reduced fitness compared to outcrossing populations when individuals are  
144 transplanted to the common garden environment? 2) Is there a change in the metabolome  
145 over time when plants are transplanted to a naturally variable environment compared to  
146 those that are kept under constant environmental conditions? 3) Does inbreeding alter the  
147 direction or magnitude of physiological plasticity over time or across environments?

148         Our results reveal no consistent effects of mating system on fitness or short-term  
149 physiological responses to environmental changes, despite clear metabolomic divergence  
150 under the two growing environments at the later time point. The remarkable similarity in  
151 metabolic responses of inbred and outcrossed populations suggests that standing genetic  
152 variation is not important for adaptive physiological plasticity under potentially stressful  
153 novel environments.

154

## 155 **MATERIALS AND METHODS**

### 156 **Seed sampling and plant origins**

157 Seeds were collected from 25-40 individual *A. lyrata* ssp. *lyrata* plants per population from  
158 thirteen sites across the North American Great Lakes region (Fig 1a; Table S1), with eight  
159 outcrossing and five inbreeding populations selected based on a combination of  
160 outcrossing rates ( $t_m$ ) estimated using progeny arrays, proportion of self-compatible  
161 individuals (reflecting potential for inbreeding), and observed heterozygosity ( $H_o$ ;  
162 reflecting actual history of inbreeding) in a previous study (Fuxe et al., 2010)(see Table S2



163 **Figure 1:** *Arabidopsis lyrata* sampling location and variation in phenology and fitness among populations and with respect to population mating system.  
 164 (a) map of sampling sites with eight outcrossing and five inbreeding populations and an \* indicating those populations used for metabolomics analysis; (b)  
 165 boxplot of rosette area (mm<sup>2</sup>) before transplantation to common garden; (c) proportion of plants flowering per population at 8 time points over an 8-week  
 166 period (dashed lines = inbreeding populations; solid lines = outcrossing populations; (d) boxplot of reproductive effort (average length of fruits multiplied  
 167 by number of fruits produced) on 1<sup>st</sup> July 2013. For (a), (b) and (d), dark grey indicates outcrossing populations, and white indicates inbreeding  
 168 populations. Site codes and sample sizes are given under plots (b) and (d), in which populations are ordered by decreasing outcrossing rates (from left to  
 169 right).  
 170

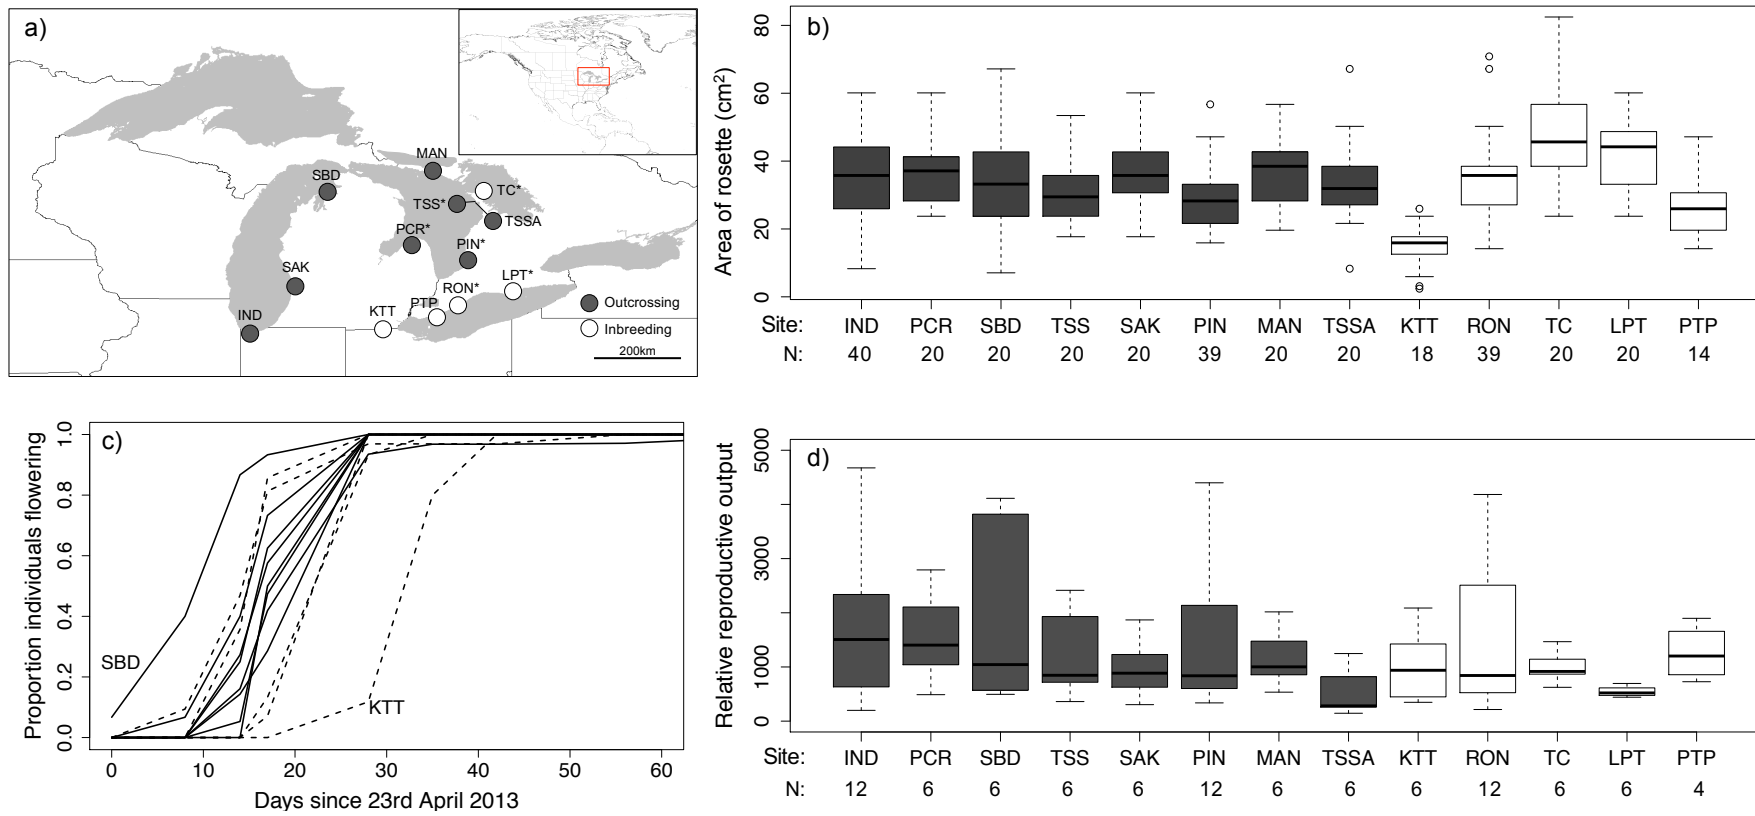

171

172 for values of  $t_m$  and  $H_o$ ). Seeds were collected in 2011 (Table S2), except for two  
173 inbreeding populations (KTT in 2007 and PTP was supplemented in 2012). Outcrossing  
174 populations have significantly higher observed heterozygosity and nucleotide diversity  
175 relative to inbreeding populations based on both neutral microsatellite markers (Table S2;  
176 Foxe et al. 2010) and RAD-seq markers (Buckley *et al.* 2016). A mixed mating population  
177 TSSA ( $t_m = 0.41$ ) was grouped with the outcrossing populations ( $t_m = 0.83-0.99$ ) rather  
178 than the inbreeding populations ( $t_m = 0.09-0.31$ ), as it showed similar levels of genome-  
179 wide diversity and heterozygosity to the outcrossing populations (Buckley et al., 2016).  
180 Most populations were found in freshwater coastal sand dune habitats, though plants at  
181 some sites (TC and TSSA) occupied rocky, alvar habitats and KTT was found in an oak  
182 woodlands sand flat. The inbreeding populations are predicted to represent three putatively  
183 independent origins of selfing (Foxe et al., 2010), with geographically proximate  
184 outcrossing populations predicted to be in the same genetic cluster included, where  
185 possible for metabolomics analysis: 1) inbreeding: RON, PTP, LPT; outcrossing: PCR,  
186 PIN; 2) inbreeding: TC; outcrossing TSS, TSSA; 3) inbreeding KTT is not located on a  
187 lakefront but it is on a similar latitude as IND, which is in the same genetic cluster as SAK,  
188 SBD, and MAN (Table S1).

189

## 190 **The effects of population inbreeding on growth, survival and reproduction**

### 191 ***Experimental Design***

192 To compare relative fitness of outbred and inbred *A. l. lyrata*. we established a common  
193 garden in a novel environment in Scotland (at the University of Glasgow Scottish Centre  
194 for Ecology and the Natural Environment, SCENE, on Loch Lomond; 56.1289°N, 4.6129°  
195 W). The summer months in this part of Scotland tend to be relatively cool and wet, and  
196 winter months more mild, than the corresponding times of the year around the North  
197 American Great lakes, where hot and dry summers and cold winters are more common.  
198 The common garden site was situated in a clearance surrounded by deciduous woodland.

199 We therefore expected this common garden to represent a novel environment for *A. lyrata*.  
200 Seeds were germinated under controlled growth chamber conditions (16h: 8h, 20°C:16°C,  
201 light: dark cycle) in Levington F2+S (seed & modular + sand) compost in 40-cell seedling  
202 propagators (Parasene, Cradley Heath, UK) to maximise germination rates. Three seeds  
203 from each of 20 maternal families per population were germinated per tray cell and thinned  
204 to one seedling per maternal family per population. For three populations (outcrossing IND  
205 and PIN and inbreeding RON) we used one seedling from each of 40 maternal seed  
206 families to obtain more precise estimates of fitness. These were three of the largest  
207 populations of *A. lyrata* in the field, and therefore were sites from which seeds from a  
208 greater number of maternal families were available. For one inbreeding population (PTP)  
209 only 14 maternal seed families were available (Table S2).

210

211 In total, 310 individuals, 199 of which were from outcrossing populations and 111 from  
212 inbreeding populations, were transplanted to the common garden on 21<sup>st</sup> September 2012.  
213 They were placed in a raised bed filled with Levington F2+S compost and horticultural grit  
214 to enhance drainage, and surrounded by high wire fencing to exclude mammalian  
215 herbivores. Two iButton dataloggers were placed in the centre of the plot to record above-  
216 ground and below-ground temperatures. Four propagator trays with 5-10 individuals from  
217 each population formed a block and four blocks were placed in a linear common garden  
218 plot (Fig S1). Plants in the common garden were watered once after transplanting, but  
219 thereafter no additional water or fertiliser was added during the experimental period.  
220 Seedlings from different populations were systematically arranged across the trays to  
221 distribute populations differing in mating system evenly across the common garden plot  
222 (Fig S1). Rosette size on transplant (7 weeks after germination) was calculated as the area  
223 of a circle from two perpendicular measurements of rosette diameter.

224

225 ***Survival and reproductive phenology in the common garden***

226 Plants were checked approximately once a week in the spring from 23<sup>rd</sup> April to 4<sup>th</sup> June  
227 (and then every 2 weeks till 9<sup>th</sup> July) to record the proportion of plants with at least one  
228 open flower. All plants, except two individuals had flowered by early June. At the  
229 beginning of July, we counted the total number of fruits produced by two haphazardly  
230 selected individuals per population from each of three experimental blocks (in total 6  
231 individuals per population, or 12 for populations IND, PIN and RON), to provide a  
232 snapshot measure of reproductive effort. Mean fruit length, which is highly correlated with  
233 seed number (Hoebe, 2009), was measured, on average, from five haphazardly selected,  
234 fully-developed fruits from each individual. Relative reproductive output per individual  
235 for this subset was then calculated as the number of fruits multiplied by the mean fruit  
236 length. The proportion of plants surviving overwinter was recorded in late spring on 28<sup>th</sup>  
237 May 2013 and 21<sup>st</sup> May 2014. Survival in 2014 therefore represents cumulative fitness  
238 over the time course of the experiment.

239

#### 240 ***Statistical analyses***

241 The effect of population mating system on each response variable (plant rosette area before  
242 transplantation, proportion plants flowering, survivorship, number of fruits, mean length of  
243 fruits per plant and the combined measure of relative reproductive output) was tested using  
244 generalised linear mixed effects models (GLMMs) using the R package *lme4* (Bates *et al.*  
245 2015). Population mating system was included as a fixed factor in the models, and  
246 population was modelled as a random effect, to account for unexplained variation due to  
247 geographic source. For traits where all plants were measured (rosette area, proportion  
248 flowering, survivorship) experimental block was also included as a separate random factor  
249 in this model. Where traits were only measured for a subset of individuals (fruit length,  
250 number fruits, reproductive output) there were insufficient individuals to estimate random  
251 effects of experimental block. To account for multiple testing, a Bonferroni-correct P-value  
252 threshold of 0.008 (0.05 divided by 6) was used to identify significant mating system

253 effects. Binomial error distributions were used for modeling binary traits (survival and  
254 flowering status) and a normal error distribution used for continuous traits (rosette area and  
255 reproductive output). When modeling survival and propensity to flower, rosette size at  
256 transplant was included as a covariate to account for differences in initial growth rates in  
257 the cabinets. Model residuals were inspected to ensure good model fit and where necessary  
258 the response variables were log-transformed. To directly test for differences among  
259 populations in each response variable, we used separate models for a fixed effect of  
260 population on the different response variables controlling for the random effect of  
261 experimental block, but not considering mating system. Again a reduced P-value threshold  
262 of 0.008 was used to account for multiple testing and identify significant relationships. As  
263 multiple fruits were measured per individual, we additionally used a linear mixed effects  
264 model to estimate the proportion of variance in fruit length associated with population,  
265 maternal plant (family) and within-plant (residual variance). Likelihood ratio tests were  
266 used to estimate the significance of fixed effects following their removal from a model.

267 We additionally tested for variation in fitness-related traits consistent with local  
268 adaptation along the latitudinal range (41.6206 -45.6703 decimal degrees) occupied by  
269 these populations, and whether any of the fitness-related traits varied with population  
270 mating system. We conducted regression analyses to test for a significant interaction  
271 between mating system (inbreeding and outcrossing) and latitude for each of the above-  
272 described fitness-related traits, as well as the separate effect of latitude. The statistical  
273 models used for each trait were the same as described above.

274

## 275 **The effects of population inbreeding on the metabolome**

### 276 *Experimental Design*

277 To determine whether population mating system affected the physiological response under  
278 contrasting environmental conditions, we compared metabolomic profiles over time for  
279 three outcrossing (PIN, PCR and TSS) and three inbreeding (RON, TC, LPT) populations

280 when transplanted outdoors to the common garden, or when kept in a controlled growth  
281 chamber. We selected the three outcrossing and three inbreeding populations to represent  
282 similar levels of genetic structure and geographic range within each mating system group.  
283 Specifically, previous research showed that the chosen populations represent two different  
284 genetic clusters, with PIN, PCR, RON and LPT in one and TSS and TC in another (Fuxe *et*  
285 *al.* 2010; Buckley *et al.* 2016). We germinated seeds from five maternal plants from each  
286 population under controlled growth cabinet conditions for six weeks. In August 2013 one  
287 seedling from each mother was either transplanted to new trays (6cm deep) under the same  
288 growth chamber conditions, or transplanted to the common garden environment (used in  
289 the fitness experiment).

290

### 291 ***Sampling strategy and methods for collecting leaf tissue***

292 Two similar-sized leaves were sampled from the rosette of each individual at three time  
293 points in the common garden environment to examine changes in the metabolome over  
294 time. Each individual was sampled: 1) before transplanting to the outdoor environment  
295 (4th August 2013) to establish baseline profiles; 2) ~24h after transplantation to test for  
296 effects of ‘transplant shock’ (7th August 2013); and 3) 1 month after transplantation (5th  
297 September 2013), to give time for the plants to physiologically adapt to the growing  
298 environment. Any dirt was quickly removed from sampled leaves, before leaves were  
299 placed in a cryo-tube and flash frozen in liquid nitrogen. They were kept frozen on dry ice  
300 for a maximum of 2h during transport and then transferred to a -70°C freezer. The samples  
301 from the growth chamber plants were collected on the same days and in the same manner  
302 as described above. The plants were checked for signs of disease or herbivore damage and  
303 photos were taken of trays just before sampling to monitor their general status (e.g. colour  
304 of leaves).

305

### 306 ***Metabolomic data generation***

307 For the three inbreeding and three outcrossing populations, individuals were  
308 selected for metabolite screening if leaf samples were available at all three time points for  
309 the two experimental growing conditions. Individuals from the same maternal families  
310 were used in the common garden experiment and the growth chamber. To allow us to  
311 assess changes in the metabolome over three timepoints and two treatments, metabolomics  
312 data was generated for only three individuals per population (nine individuals per mating  
313 system group). We therefore had insufficient power to resolve population-level differences  
314 in metabolomic plasticity through time and under different growing environments. One  
315 leaf per individual was placed in a Fastprep RNA bead tube (Lysing matrix D) and  
316 disrupted thoroughly in a Fastprep machine (MP Biomedicals). Each tube was dipped in  
317 liquid Nitrogen, and then disrupted in 2 x 10s runs, with samples refrozen in between runs.  
318 Then 1mL of chilled (-15°C) extraction buffer (chloroform: methanol: water in a 1:3:1  
319 ratio) was added and the tube vortexed for 5s. The mixture was shaken on ice for 10min  
320 and centrifuged for 30s to separate tissue and lysate. The clear lysate was transferred to a  
321 new tube and used for metabolomics analysis. Briefly, 10 $\mu$ L of each sample was  
322 introduced to a liquid chromatography system (UltiMate 3000 RSLC, Thermo, UK) and  
323 separated on a 4.6 mm x 150 mm ZIC-pHILIC analytical column with a 2 mm x 20 mm  
324 guard column. The eluents were A: water with 20 mM ammonium carbonate and B:  
325 acetonitrile. The gradient ran from 20% A, 80% B to 80% A, 20% B in 15min with a wash  
326 at 95% A for 3min followed by equilibration at 20% A for 8min. Metabolites were  
327 detected using an Orbitrap Exactive (ThermoFisher, UK) instrument in positive/negative  
328 switching mode at resolution 50,000 with a m/z scan range of 70-1400. In total, 108  
329 samples, plus a sample of pooled individual extractions for quality control, were run in a  
330 randomised order interspersed with twelve blank extraction buffer samples. The LC-MS  
331 data were annotated using a bespoke bioinformatics pipeline (mzMatch, IDEOM and  
332 PiMP) developed at Glasgow Polyomics (Scheltema et al., 2011; Creek et al., 2012;  
333 Gloaguen et al., 2017). IDEOM assigns confidence scores ranging from 0-10 to each

334 putative compound identification. We considered all compounds with an IDEOM score of  
335 at least 6 that were present at either the first or third experimental time point, which  
336 resulted in a final dataset of 936 metabolites. The raw peak heights for each putative  
337 compound in each individual sample was then corrected by subtracting the average of the  
338 twelve blank readings for that identified compound. These corrected peak heights were  
339 used for further analysis. The identity of 106 metabolites was confirmed through  
340 comparison of retention times and masses to a panel of 122 standards, of which 96  
341 compounds were uniquely identified and 13 had two related identifications (from now  
342 referred to as ‘confidently identified metabolites’).

343

## 344 **Metabolomics Analyses**

### 345 *Multivariate Analyses*

346 Principal Components Analysis (PCA) was performed on the dataset of 936 metabolites  
347 measured over the three time points using the R function ‘*prcomp*’. We plotted the first  
348 two principal components against each other to explore broad patterns of change in the  
349 metabolite data with respect to experimental growing condition, time point and population  
350 mating system. As a measure of plasticity, we compared the magnitude and direction of  
351 metabolome shifts in response to the two different growth conditions (growth chamber and  
352 outdoor common garden). We also plotted the difference in values of the first five principal  
353 components (PCs) for related individuals (same maternal family) growing in the different  
354 environments at time point 3 as a measure of relative plasticity. If reduced genetic  
355 variation from multiple generations of selfing compromises plasticity in key traits, we  
356 predicted that individuals from inbreeding populations would show a reduced magnitude of  
357 change in each PC relative to those from outcrossing populations. To test this, we used a  
358 two-way ANOVA with mating system as a fixed effect and the magnitude of this  
359 difference for each of the first five PCs separately as a response variable.

360



### 361 *Metabolite diversity*

362 Metabolite diversity was also estimated using a set of diversity measures that have been  
363 developed to assess the relative importance of differences in the abundance of species, as  
364 well as the presence or absence of species in a community (Leinster and Cobbold, 2012).  
365 Specifically, the emphasis placed on relative abundance is changed by adjusting a  
366 parameter  $q$ . In the context of metabolite data,  $q = 0$  is equivalent to the total number of  
367 metabolites observed (with all metabolites weighted equally), whereas  $q = 1$  or higher  
368 results in lower abundance metabolites having less influence on the diversity measures (i.e.  
369 the most abundant compounds shape diversity estimates). Here, we should note that using  
370 an untargeted metabolomics approach means that variation in raw peak heights among  
371 identified metabolites may reflect both inherent differences in metabolite detectability, as  
372 well as variation in their actual abundance. Estimating diversity using  $q = 1$  therefore  
373 assumes that variation in metabolite detectability does not vary over orders of magnitude,  
374 which may not always be the case. Nevertheless, our ability to estimate the ‘true’ diversity  
375 of metabolites should not impact our statistical comparison of changes in diversity profiles  
376 over time in each growing environment for inbred and outcrossed individuals. We  
377 therefore statistically tested whether variation at  $q = 0$  (metabolite “richness”) and  $q = 1$   
378 (when relative abundance is considered) was explained by time, environment, mating  
379 system or their interactions using GLMMs, with likelihood ratio tests used to determine the  
380 significance of individual terms and population included as a random effect. Non-  
381 significant interactions and individual terms were sequentially removed until a reduced  
382 final model consisting of only significant interactions and terms remained.

383

### 384 *Changes in individual metabolites and metabolite pathways*

385 To comprehensively test for the importance of mating system in explaining  
386 variation in metabolite concentrations, we used GLMMs to model variation in corrected  
387 peak heights for each of the 936 metabolites. We accounted for the random effect of

388 population and tested the fixed effects of mating system, time, treatment, and all two-way  
389 and three-way interaction. Given the difficulty of interpreting three-way interactions, we  
390 also tested the effects of time, mating system and their interaction for each experimental  
391 condition separately. Given that time points 1 and 2 showed similar multivariate  
392 metabolomic patterns, we focused on data from time points 1 and 3 in the analysis for each  
393 environment separately. We corrected for multiple testing using the Benjamini-Hochberg  
394 procedure for restricting the false discovery rate to 5%. For the subset of confidently-  
395 identified metabolites, we identified those metabolites that were on average > 1-fold higher  
396 or lower in the common garden samples relative to the growth chamber samples at time  
397 point 3, but which showed no difference (< 1-fold changes) at time point 1 (when all  
398 plants were in the growth chamber). For these confidently identified compounds we also  
399 tested for a significant interaction between mating system, growing environment and time  
400 (focused on time points 1 and 3) using a linear mixed model as described previously. After  
401 correcting for multiple testing, we identified metabolites showing both a significant 3-way  
402 interaction involving mating system, and a strong response to the common garden  
403 environment (through fold-change comparisons).

404

## 405 **RESULTS**

### 406 *Natural population inbreeding does not reduce fitness in a novel common garden*

#### 407 *environment*

408 Of the 310 transplanted individuals, 251 (79.0%) survived the first winter, with no  
409 significant effect of either mating system (Table 1: Likelihood Ratio statistic (LR-stat =  
410 0.50, df = 1, P = 0.479) or initial rosette size (LR-stat = 0.91, df = 1, P = 0.340) on  
411 survival. Rosette size itself did not significantly vary with mating system (Fig 1b; LR-stat  
412 = 0.025, df = 1, P = 0.874), despite showing significant variation among populations (Fig  
413 1b; LR-stat = 124.8, df = 12, P < 0.0001). Survival was markedly lower over the second  
414 winter, with only 34 individuals (11.0%) surviving to spring 2014, and again no effect of

415 **Table 1:** The proportion of surviving plants per population in the common garden on 28<sup>th</sup>  
 416 May 2013 and a year later on 21<sup>st</sup> May 2014.

| Site <sup>a</sup> | Decimal degrees <sup>b</sup> |           | N <sup>c</sup> | Proportion surviving |       |
|-------------------|------------------------------|-----------|----------------|----------------------|-------|
|                   | Latitude                     | Longitude |                | 2013                 | 2014  |
| SAK               | 42.7044                      | 86.2086   | 20             | 0.700                | 0.200 |
| LPT               | 42.5797                      | 80.3875   | 20             | 0.700                | 0.000 |
| SBD               | 44.9389                      | 85.8703   | 20             | 0.750                | 0.300 |
| MAN               | 45.6703                      | 82.2753   | 20             | 0.750                | 0.250 |
| TC                | 45.2417                      | 81.5175   | 20             | 0.750                | 0.000 |
| IND               | 41.6214                      | 87.2122   | 40             | 0.775                | 0.100 |
| TSS               | 45.1925                      | 81.5839   | 20             | 0.800                | 0.050 |
| TSSA              | 45.1908                      | 81.5906   | 20             | 0.800                | 0.050 |
| RON               | 42.2614                      | 81.8464   | 39             | 0.821                | 0.051 |
| PIN               | 43.2689                      | 81.8314   | 39             | 0.846                | 0.077 |
| KTT               | 41.6206                      | 83.7875   | 18             | 0.944                | 0.000 |
| PCR               | 44.0042                      | 83.0739   | 20             | 0.950                | 0.100 |
| PTP               | 41.9278                      | 82.5142   | 14             | 1.000                | 0.429 |
| Outcrossing       |                              |           | 199            | 0.799                | 0.131 |
| Selfing           |                              |           | 111            | 0.806                | 0.114 |

417  
 418 <sup>a</sup> sites are ordered by increasing proportion of individuals surviving in 2013; shaded  
 419 populations represent outcrossing populations and unshaded inbreeding populations.

420 <sup>b</sup> coordinates in decimal degrees describing the latitude and longitude of each study  
 421 location

422 <sup>c</sup> number of individuals at the start of the experiment in November 2012.

423

424

425 mating system (Table 1; LR-stat = 1.76, df = 1, P = 0.185), although outcrossing

426 populations showed evidence for being more resilient to the challenges of overwintering.

427 Specifically, over the second winter less than 5% of individuals survived in four of the five

428 inbreeding populations, whereas only two of the eight outcrossing populations showed

429 such low mortality (Table 1). The overall low survival over the second winter may in part

430 be due to the milder winter temperatures experienced over the winter of 2013 (average

431 2.44°C) compared to 2012 (average 4.04°C; Fig S2). Despite no significant effect of

432 inbreeding, the fixed effect of population explained 17.2% of variance in survival over the

433 second winter (LR-stat = 36.8, df = 12, P = 0.0002), but was not significant for survival

434 over the first winter. Interestingly, the inbreeding populations showed both the highest

435 (PTP) and lowest (LPT, TC, KTT) rates of survival over the second winter, which  
436 emphasises population is more important than mating system for explaining patterns of  
437 survival.

438 Population mating system also did not affect flowering phenology, with 88% of  
439 plants flowering within a 20-day time period in May. However, there were clear population  
440 effects, with individuals from SBD (outcrossing) flowering earliest and those from KTT  
441 (inbreeding) flowering latest (Fig 1c). On 10<sup>th</sup> May 2013, when just over 50% of plants  
442 were flowering, there was no effect of population mating system on the propensity of  
443 individual plants to flower (LR-stat = 1.87, df = 1, P = 0.171), but there were significant  
444 population-level effects (LR-stat = 89.91, df = 12, P < 0.0001), and also a small,  
445 significant positive effect of rosette size when transplanted on the likelihood of flowering  
446 (LR-stat = 4.20, df = 1, P = 0.041).

447 In mid-July, no measure of reproductive investment varied with respect to mating  
448 system (number of fruits: LR-stat = 3.00, df = 1, P = 0.083; average fruit length: LR-stat =  
449 0.04, df = 1, P = 0.842), although significant differences between populations were  
450 apparent (number of fruits: LR-stat = 31.46, df = 12, P = 0.002, Length fruits: LR-stat =  
451 52.49, df = 12, P < 0.0001; Fig S3a,b). The percentage of within-individual variance in  
452 fruit length was 36.6%, which is similar to that explained by maternal plant (34.5%) and  
453 population (28.9%). By contrast, in this analysis mating system explained ~0% variance in  
454 fruit length. The combined measure of relative reproductive output revealed no significant  
455 effects of mating system on relative reproductive effort at this single time point when  
456 controlling for the random effect of population (Fig 1d; LR-stat = 3.08, df = 1, P = 0.079).  
457 There was also no significant difference among populations in relative reproductive effort,  
458 when population was considered as a fixed effect for the analyses (LR-stat = 7.50, df = 12,  
459 P = 0.377).

460 While on average selfing populations showed lower reproductive output than  
461 outcrossing populations in terms of numbers of fruits per individual (Table 2), this was

462 **Table 2:** Fitness-related trait means, sample sizes and 95% confidence intervals for the study populations, as well as when separated into inbreeding and  
463 outcrossing groups. Rosette area (estimated area of a circle in cm<sup>2</sup> is given) was measured for all plants, whereas fruit length (based on an average of 5  
464 fruits per plant), the total number of fruits at a mid-season timepoint and total reproductive output (fruit length\*number of fruits) was measured for a  
465 subset of plants (as described in the main text).  
466

| Population         | Rosette area (cm <sup>2</sup> ) |              |                       | Average fruit length (mm) |              |                       | Number of fruits |                       | Total reproductive effort |                           |
|--------------------|---------------------------------|--------------|-----------------------|---------------------------|--------------|-----------------------|------------------|-----------------------|---------------------------|---------------------------|
|                    | N                               | Mean         | 95% CI                | N                         | Mean         | 95% CI                | Mean             | 95% CI                | Mean                      | 95% CI                    |
| IND                | 40                              | 35.23        | [31.55; 38.90]        | 12                        | 25.85        | [22.60; 29.11]        | 63.75            | [31.68; 95.82]        | 1665.74                   | [866.23; 2465.25]         |
| PCR                | 20                              | 36.39        | [31.69; 41.09]        | 6                         | 25.09        | [22.04; 28.13]        | 60.83            | [29.78; 91.89]        | 1538.96                   | [685.55; 2392.36]         |
| SBD                | 20                              | 34.49        | [27.99; 40.99]        | 6                         | 26.9         | [23.68; 30.13]        | 66.17            | [6.78; 125.56]        | 1847.51                   | [83.11; 3611.90]          |
| TSS                | 20                              | 30.5         | [26.39; 34.60]        | 6                         | 18.75        | [13.29; 24.20]        | 62.42            | [24.60; 100.23]       | 1186.1                    | [347.14; 2025.05]         |
| SAK                | 20                              | 35.97        | [31.07; 40.87]        | 6                         | 30.13        | [24.64; 35.62]        | 32.92            | [12.95; 52.88]        | 966.36                    | [400.70; 1532.02]         |
| PIN                | 39                              | 28.83        | [25.91; 31.76]        | 12                        | 23.69        | [21.08; 26.29]        | 56.08            | [29.06; 83.11]        | 1419.48                   | [620.00; 2218.96]         |
| MAN                | 20                              | 36.58        | [31.73; 41.42]        | 6                         | 22.59        | [19.07; 26.12]        | 49.42            | [31.76; 67.07]        | 1147.84                   | [598.50; 1697.19]         |
| TSSA               | 20                              | 33.43        | [27.92; 38.94]        | 6                         | 17.94        | [8.75; 27.12]         | 25.83            | [9.68; 41.99]         | 550.8                     | [-31.42; 1133.02]         |
| <b>Outcrossing</b> | <b>199</b>                      | <b>33.57</b> | <b>[32.04; 35.10]</b> | <b>54</b>                 | <b>24.73</b> | <b>[23.34; 26.11]</b> | <b>56.82</b>     | <b>[46.01; 67.64]</b> | <b>1428.58</b>            | <b>[1132.89; 1724.27]</b> |
| KTT                | 18                              | 14.51        | [11.34; 17.67]        | 6                         | 27.27        | [25.26; 29.27]        | 36.67            | [12.62; 60.71]        | 1030.89                   | [300.22; 1761.57]         |
| RON                | 39                              | 34.53        | [30.64; 38.43]        | 12                        | 22.65        | [20.27; 25.04]        | 64.71            | [31.00; 98.41]        | 1559.56                   | [693.16; 2425.96]         |
| TC                 | 20                              | 48.42        | [40.78; 56.06]        | 6                         | 25.68        | [22.01; 29.35]        | 35.5             | [15.34; 55.66]        | 1003.76                   | [609.44; 1398.09]         |
| LPT                | 20                              | 41.94        | [37.49; 46.39]        | 6                         | 33.45        | [25.76; 41.14]        | 14.08            | [9.68; 18.49]         | 544.68                    | [373.39; 715.96]          |
| PTP                | 14                              | 26.84        | [22.08; 31.60]        | 4                         | 24.62        | [22.08; 27.16]        | 51.5             | [14.83; 88.17]        | 1257.18                   | [440.70; 2073.66]         |
| <b>Selfing</b>     | <b>111</b>                      | <b>34.15</b> | <b>[31.22; 37.09]</b> | <b>40</b>                 | <b>24.61</b> | <b>[22.68; 26.53]</b> | <b>41.38</b>     | <b>[29.75; 53.00]</b> | <b>1107.79</b>            | <b>[792.28; 1423.29]</b>  |

467

468

469

470 driven by very low values for one of the selfing populations (LPT), in contrast to another  
471 selfing population on Lake Erie (RON), which showed a reproductive output on the higher  
472 end of values observed in the outcrossing populations.

473 Rosette area before transplantation showed a significant interaction between mating  
474 system and latitude (Fig S4a), with a significantly increase in size with latitude for  
475 inbreeding, but not outcrossing populations. Flowering time also showed a significant  
476 interaction between mating system and latitude (Fig S4c), with an increase in flowering at  
477 the early time point for outcrossing populations with latitude but a very low flowering rate  
478 in the selfing population found at the highest latitude (TC). There was also a weakly  
479 negative effect of latitude on mean fruit length, but the pattern was the same in outcrossing  
480 and selfing populations (Fig S4e). After controlling for multiple testing, survival rates in  
481 both 2013 and 2014, the number of fruits produced and relative reproductive output at a  
482 mid-season timepoint showed neither a significant effect of latitude, nor an interaction of  
483 latitude with mating system (Fig S4b, d, f).

484

485 ***Physiological responses to novel environments are driven by time and experimental***  
486 ***treatments, with limited impact of inbreeding.***

487 Plants growing outside for the metabolomics study were exposed to herbivores and  
488 disease during the time course of sampling, and we avoided sampling any heavily damaged  
489 or infected plants for metabolomics analysis. At time point 2 (7<sup>th</sup> August), the earliest time  
490 of sampling leaves in the field, there was no evidence for herbivore damage or disease on  
491 any plants used in the metabolomics analysis. At time point 3 (on 5<sup>th</sup> Sept), eight of the 18  
492 plants analysed showed no herbivore damage, and five of the 18 plants showed damage to  
493 just 1 leaf. The remaining five plants showed 2 or 3 damaged leaves). Molluscs were most  
494 likely causing this minor damage, and damage was mostly restricted to older leaves, which  
495 were not sampled in our study (JB personal observation). Additionally, three individuals  
496 showed early signs of *Albugo candida* infection (a common oomycete parasite of the

497 Brassicaceae). These three individuals included one inbreeding (RON) and two outcrossing  
 498 individuals (PIN and TSS). Therefore, the observed rates of infection and low levels of  
 499 herbivore pressure should not impact the observed absence of inbreeding effects on the  
 500 metabolome.

501 At time point 3 (one month after transplantation) there was clear divergence  
 502 between plants in the growth chamber and common garden in growth and appearance (Fig  
 503 S5), which made this time point the most informative for examining inbreeding effects on  
 504 physiological plasticity. The first five principal components (PCs) extracted from all  
 505 compounds explained 50.1% variation in the metabolome (Table 3).

506

507 **Table 3:** The significance of population mating system (inbreeding or outcrossing), time,  
 508 experimental environment and their interactions for explaining variance in the first five  
 509 principal components generated using data from 936 metabolites.

510

| Principal component | % variance in metabolites | Final model (explanatory factors) <sup>a</sup> | Significance of final model <sup>b</sup> |
|---------------------|---------------------------|------------------------------------------------|------------------------------------------|
| PC1                 | 19.86                     | environment * time                             | LR-stat = 77.75, df=2, p<0.0001          |
| PC2                 | 13.07                     | time                                           | LR-stat=42.80, df=2, p<0.0001            |
| PC3                 | 7.00                      | environment * time * mating system             | LR-stat=7.33, df=2, p=0.026              |
| PC4                 | 5.29                      | environment * time                             | LR-stat=19.99, df=2, p<0.0001            |
| PC5                 | 3.08                      | environment * time * mating system             | LR-stat=7.06, df=2, p=0.029              |

511 <sup>a</sup> minimal adequate linear mixed model to explain variation in the principal component,  
 512 generated by removing factors in order of complexity from a starting model of a 3-way  
 513 interaction between all three fixed factors.

514 <sup>b</sup> likelihood ratio test statistic, associated degrees of freedom and p-value on comparison of  
 515 the final model to the next most simple (nested) model.

516

517

518 Plotting PC1 (19.9% variance) against PC2 (13.1%) showed clear evidence for

519 divergence in metabolite profiles at time point 3 compared to the earlier time points,

520 particularly in the outdoor growth conditions, but with no strong effects of mating system  
521 (Fig 2a). Variation in these five PCs were mostly influenced by the interacting effects of  
522 growing environment and time, rather than mating system (Table 3). At time points 1,  
523 there was some clustering by population in both the growth cabinet and common garden  
524 environment, whereas at time point 3 this was only clear in the common garden, but in  
525 neither case was the pattern strongly associated with mating system or latitude (Fig S6).  
526 Time was a significant fixed factor for all five PCs and growing environment-by-time  
527 interactions were significant for four of the PCs. Despite a strong metabolomic shift over  
528 time in the experiment, there was no evidence for altered physiological plasticity at time  
529 point 3 in inbreeding populations. The direction and magnitude of change in PC1 and PC2  
530 were mostly consistent across families and independent of population mating system (Fig  
531 2b -2e). PC3 to PC5 (Fig S7a-f) also showed no effect of mating system on metabolomic  
532 plasticity, except that inbreeding populations showed greater variance in the magnitude of  
533 the metabolomic shift for PC5 (Fig S7f).

534         The diversity of metabolites changed significantly over time in the outdoor  
535 common garden environment, but again independent of mating system (Fig 3).  
536 Specifically, the metabolite richness (number of metabolites, when  $q = 0$ ) showed a  
537 significant time\*treatment interaction ( $P < 0.0001$ ; Fig 3a) with fewer metabolites at time  
538 point 3 in the outdoor common garden, but not in the growth chamber. After accounting  
539 for relative abundance of metabolites (using  $q = 1$  to reduce the contribution of rare  
540 compounds to estimated diversity), there was a significant time\*treatment and significant  
541 mating system\*treatment interaction (combined model significance:  $P < 0.0001$ ). This was  
542 driven by a greater number of abundant compounds at time point 3 in the outdoor common  
543 garden, but also a tendency for inbred individuals to show an elevated number of abundant  
544 compounds relative to outcrossed populations at all time points in the growth chamber, but  
545 not in the common garden (Fig 3b).

546



**Figure 2:** Multivariate variation and plasticity in the *Arabidopsis lyrata* metabolome with respect to time, mating system and experimental treatment: (a) visualised by plotting principal components 1 and 2, with colours indicating three different time points of sample collection (see key, Time 1= pre-transplant, Time 2 = 1 day after transplant, Time 3 = 1 month after transplant), symbols indicating environments (circles = growth chamber, triangles = common garden) and fill denoting mating system (open= inbreeding; filled = outcrossing); (b,d) plots of PC1 and PC2 values, respectively, for each individual at time point 3 for the two environments, with lines joining related individuals from the same family. Dashed lines (and open shapes) connect individuals from inbreeding populations and solid lines (and filled shapes) indicate those from outcrossing populations; (c,e) boxplots representing the change in PC1 and PC2 respectively between growing environments for related individuals grouped by population inbreeding status. The significance of population inbreeding on the magnitude of plasticity is indicated.

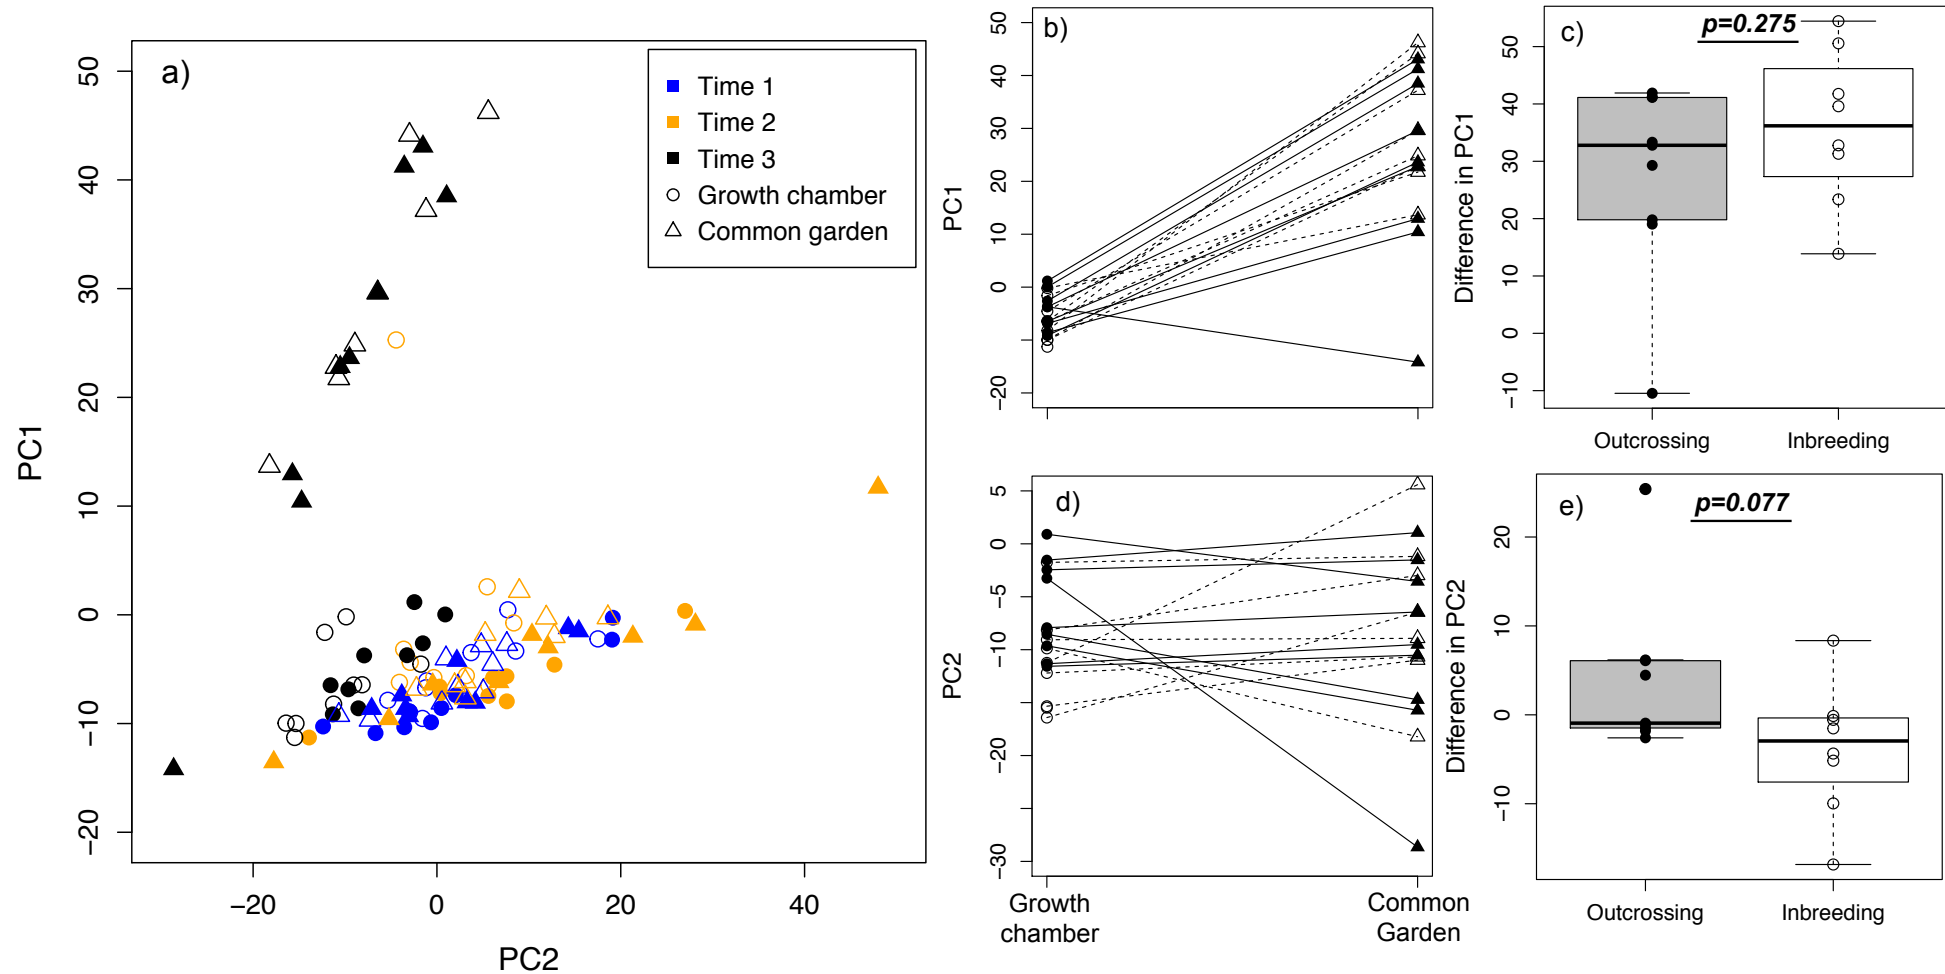

1 **Figure 3:** Metabolite diversity across the two growing environments for three different  
2 time points and individuals from outbred and inbred populations of *Arabidopsis lyrata*.  
3 Two measures of diversity are given based on (a)  $q=0$  (analogous to number of metabolites  
4 observed) and (b)  $q=1$  (reduced emphasis on metabolites at lower concentrations). Shaded  
5 boxes represent samples from outcrossing populations and open boxes those from  
6 inbreeding populations. The best model for explaining variation in diversity is given above  
7 each plot. The statistics represent the significant change in model likelihood when the full  
8 model was compared to the next simplest model.  
9

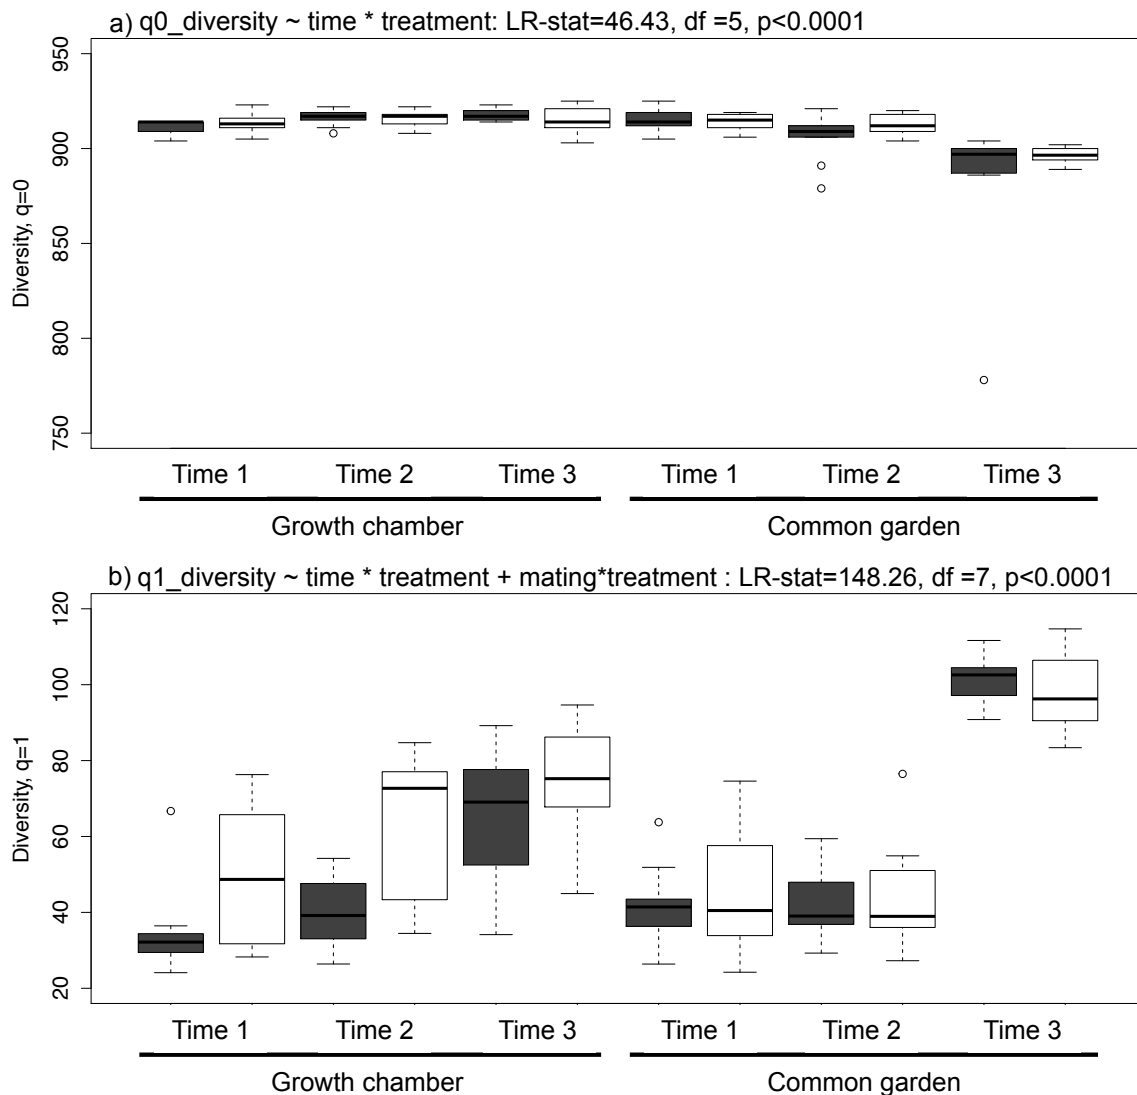

10  
11

12

13 ***Individual metabolite data reveals limited effects of inbreeding, but clear changes in***  
14 ***metabolites between growing environments over time***

15 We found that 59.3% of the 936 metabolites showed significant (with a FDR of  
16 5%) time\*treatment interactions (Table 4a). Interactions involving mating system were  
17 only significant with 5% FDR for less than 0.5% metabolites (Table 4a). When the two

18 **Table 4:** Summary of results testing the effect of interactions between time, growing  
 19 environment and mating system for 936 individual metabolites.

a)

| Interaction tested <sup>a</sup> | N p<0.05 <sup>b</sup> | N p<0.01 <sup>b</sup> | N (FDR 5%) <sup>b</sup> |
|---------------------------------|-----------------------|-----------------------|-------------------------|
| 3-way                           | 125                   | 48                    | 7                       |
| mating system*time              | 76                    | 22                    | 4                       |
| mating system *environment      | 79                    | 15                    | 0                       |
| time*environment                | 601                   | 496                   | 555                     |

20 <sup>a</sup> interactions between mating system (inbreeding or outcrossing), environment and time  
 21 (time points 1 and 3 only)

22 <sup>b</sup> number of individual metabolites significant at different p-value thresholds, or with a  
 23 false-discovery rate (Benjamini-Hochberg method) of 5%

b)

| Growing environment | Interaction tested <sup>a</sup> | N p<0.05 <sup>b</sup> | N p<0.01 <sup>b</sup> | N (FDR 5%) <sup>b</sup> |
|---------------------|---------------------------------|-----------------------|-----------------------|-------------------------|
| Growth chamber      | mating*time                     | 85                    | 27                    | 0                       |
| Growth chamber      | mating                          | 77                    | 20                    | 0                       |
| Growth chamber      | time                            | 405                   | 305                   | 337                     |
| Common garden       | mating*time                     | 42                    | 5                     | 0                       |
| Common garden       | mating                          | 63                    | 15                    | 0                       |
| Common garden       | time                            | 586                   | 496                   | 554                     |

24 <sup>a</sup> mating system by time interactions separately for each growth treatment, compared  
 25 between time points 1 and 3

26 <sup>b</sup> number of individual metabolites significant at different p-value thresholds, or with a  
 27 false-discovery rate (Benjamini-Hochberg method) of 5%

28

29

30 growing environments (growth chamber and outdoor common garden) were analysed  
 31 separately, time-by-mating system interactions were not significant for any metabolites  
 32 following multiple testing correction (Table 4b). Similarly, no metabolites showed  
 33 significant effects of just mating system in either growing environment (Table 4b). By  
 34 contrast, the effect of time alone was significant for 36.0% (growth chamber) and 59.2%  
 35 (common garden) of the metabolites (Table 4b). Notably, 1.6x more metabolites showed

36 significant changes over time in the outdoor common garden compared to the growth  
37 chamber, which suggests that the outdoor environment was more physiologically  
38 challenging for the plant.

39         Of the 106 confidently identified compounds, 27 were > 1-fold higher and 18 were  
40 > 1-fold lower in the outdoor common garden samples relative to the growth chamber  
41 samples at time point 3 (Table S3). Compounds that showed the strongest fold-changes  
42 included one annotated as the vitamin ascorbate (also annotated as D-Glucuronolactone),  
43 several members of the TCA cycle (S-malate, citrate and phosphoenolpyruvate) and  
44 several sugar phosphates associated with glycolysis and the pentose phosphate pathway  
45 (D-ribose 5-phosphate and D-glucose/D-Fructose 6-phosphate). The sugar sucrose was  
46 also 1.2-fold higher in the outdoor common garden samples. By contrast, 12 of 18  
47 compounds that showed the greatest decrease in the common garden samples were amino  
48 acids or amino acid derivatives. Only three of the compounds showing > 1-fold change in  
49 the common garden samples also showed significant mating system effects at time point 3.  
50 For two of these compounds (dUMP and D-glucose/D-fructose-6-phosphate), the effects of  
51 inbreeding were only apparent in the common garden sample set (Fig S8a,b). A significant  
52 negative effect of inbreeding in the common garden was only observed for the amino acid  
53 L-Asparagine (Fig S8c).

54

## 55 **DISCUSSION**

56         In this study, we found that highly inbred and genetically depauperate populations  
57 of *A. lyrata* sampled from multiple genetic lineages (Foxye et al., 2010; Buckley et al.,  
58 2016) show similar fitness and short-term physiological responses to a change in  
59 environment as highly outcrossing and genetically diverse populations. Specifically,  
60 inbreeding populations showed similar survival rates and reproductive output to outbred  
61 populations over a two-year period in a common garden environment outside their native  
62 range, although relationships between several fitness traits and latitude of origin did vary

63 between outcrossing and inbreeding populations. Instead, population-level effects,  
64 including latitude of origin, consistently explained more variation in fitness-related traits.  
65 Furthermore, we found that mating system had very little impact on the magnitude or  
66 plasticity of physiological responses to the novel environment, and only minor effects on  
67 metabolite diversity. Together, these results show that natural variation in inbreeding, and  
68 associated changes in genetic variation, do not negatively impact on short-term responses  
69 to changing environmental conditions.

70

71 ***Natural population inbreeding does not reduce fitness in a novel common garden***  
72 ***environment***

73 Survival over the first winter was high in the common garden, but was much lower  
74 over the second winter, likely due to milder winter conditions resulting in root degradation  
75 over the winter of 2013/2014. Such mild winter conditions are rarely encountered in their  
76 native range around the North American Great Lakes region, where sub-freezing  
77 temperatures and snow cover are expected overwinter in all of the populations sampled.  
78 Variation in survival was not significantly explained by population mating system in either  
79 year, although populations did significantly differ in survival over the second winter,  
80 suggesting that factors other than mating system may be driving over-winter tolerance.  
81 One hypothesis is that local adaptation to conditions in their native range might influence  
82 their rates of survival in this new environment. However, we found no evidence for an  
83 association between population latitude and survival in either year of this study. Three  
84 populations were sampled on the Bruce Peninsula on Georgian Bay (TSSA, TSS, TC)  
85 where the growing season is shorter than in the other populations sampled; previous  
86 surveys have found that plants typically flowered and seeds were produced approximately  
87 1 month later in these northern populations than those growing on the shores of Lake Erie  
88 (RON, LPT, PTP) (personal observation). Although the Bruce Peninsula populations  
89 showed similar survival to one another, this was not true of the Lake Erie populations,

90 suggesting that source latitude (and geographic proximity) is not a major driver of  
91 overwinter survival. In a different common garden experiment within the native range of  
92 *A. l. lyrata*, outcrossing populations showed higher survival rates after the first year, but  
93 over two years there was no effect of mating system on survival (Oakley, Spoelhof, and  
94 Schemske, 2015). Together with our results, these data suggest that reduced genetic  
95 variation due to inbreeding is not a consistent driver of variation in survival in this species.

96 A shift to selfing (and associated inbreeding) might also be associated with altered  
97 selection on growth rates, flowering traits and reproductive output (e.g. Sicard and  
98 Lenhard, 2011; Tedder et al., 2015). However, based on data from one mid-season time  
99 point, we observed no effect of mating system on the time to first flowering or measures of  
100 relative reproductive investment. Despite significant population effects on flowering time,  
101 the number of fruits produced and mean fruit length, the combined measure of relative  
102 reproductive output (a proxy for seed production) did not significantly vary among  
103 populations. By contrast, effects of mating system have been observed on flower and seed  
104 production traits in *A. l. lyrata* in two recent common garden experiments, conducted both  
105 in the native (Oakley *et al.* 2015) and non-native range (Willi *et al.* 2013), although effects  
106 were often only observed in one year and often varied between study years, supporting our  
107 finding of an absence of consistent effects of inbreeding on fitness. Furthermore,  
108 population-level, but not mating system effects, have also been observed for other  
109 flowering traits (including flower size and corolla length) in *A. l. lyrata* sampled from the  
110 same geographic region (Carleial, van Kleunen, and Stift, 2017b). These population effects  
111 may represent local adaptation to their native population environments, or simply  
112 phenotypic variation stochastically fixed in different regions following postglacial  
113 colonisation of the Great Lakes region.

114 Supporting the hypothesis of local adaptation shaping among-population trait  
115 variation, rosette area at time of transplant to the common garden tended to increase with  
116 latitude, but only in the selfing populations, which may reflect faster growth rates of

117 individuals as an adaptation to shorter growing seasons. Furthermore, mean fruit length  
118 (correlated with the number of seeds in a fruit) declined with increasing latitude, which  
119 again may reflect an adaptation for more rapid reproduction under shorter growing  
120 seasons. However, the number of fruits did not vary with population latitude of origin, and  
121 this resulted in no significant variation in relative reproductive effort in this common  
122 environment for populations from different latitudes. Interestingly, flowering time was  
123 faster for outcrossing populations from higher latitudes, consistent with a faster transition  
124 to flowering with the more contracted growing season. Yet, the high latitude selfing  
125 population, TC, showed both a slower transition to flowering, and larger rosette size at  
126 transplantation, which could either be a consequence of its ability to self-fertilise, reducing  
127 its dependency on pollinators in a short growing season, or that it must reach a larger  
128 rosette size before it transitions to flowering. Nevertheless, we included just one selfing  
129 population at a higher latitude in our study, which was associated with a distinct rocky  
130 alvar habitat rather than sand dune habitat, so the effect of inbreeding on local adaptation is  
131 difficult to determine. Further sampling of high latitude inbreeding populations is therefore  
132 necessary to test whether populations with differing mating systems may diverge in their  
133 adaptive response to the broad environmental gradients represented by latitude.

134         The populations included in our study represented multiple genetic lineages,  
135 predicted to have colonised the Great Lakes region through different postglacial dispersal  
136 corridors (Hoebe, 2009; Foxe et al., 2010). However, our fitness data suggests that  
137 genetically (and often geographically) clustered populations are not more similar to each  
138 other in survival and flowering traits, than populations from distinct genetic clusters. For  
139 example, RON, LPT, PTP form a genetic cluster with PIN and PCR, but do not show more  
140 similarity in fitness-related traits than populations sampled from other genetic clusters (e.g.  
141 TC, TSS, TSSA).

142         The absence of strongly negative inbreeding effects on fitness in our common  
143 garden, even when plants were exposed to novel and stressful winter conditions is

144 consistent with other studies, which have found that fitness differences between planting  
145 sites, experimental treatments (e.g. exposure to herbivory) or genetic families are  
146 frequently larger than the effects of experimental inbreeding (Ivey, Carr, and Eubanks,  
147 2004; O'Halloran and Carr, 2010; Murren and Dudash, 2012). Our study also supports the  
148 hypothesis that North American populations of *A. l. lyrata* show only weak negative  
149 effects of natural inbreeding in most traits studied (Stift et al., 2013; Oakley, Spoelhof, and  
150 Schemske, 2015; Carleial, van Kleunen, and Stift, 2017a). The inbreeding populations  
151 used in this study have persisted following postglacial expansion into the Great lakes  
152 region (Hoebe, 2009; Foxe et al., 2010), so selection could have removed those individuals  
153 with the greatest inbreeding load. Alternatively, growing plants in a novel environment to  
154 which all populations are maladapted could have consistently reduced inbreeding  
155 depression effects in our study (as predicted by a theoretical study: Ronce et al., 2009). By  
156 contrast, experimentally-induced selfing has negatively affected germination rates and  
157 vegetative biomass (Carleial, van Kleunen, and Stift, 2017a), as well as reduced survival  
158 and reproductive effort (Willi, 2013; Oakley, Spoelhof, and Schemske, 2015) relative to  
159 experimentally-outbred progeny in both outcrossing and selfing populations of *A. l. lyrata*.  
160 Together, these data suggest that natural variation in inbreeding, in the absence of strong  
161 inbreeding depression, does not necessarily result in reduced fitness in a novel  
162 environment.

163

164 ***Physiological responses are driven by time and growing environment, not history of***  
165 ***inbreeding***

166 Contrary to results from experimental-inbreeding studies (e.g. Kristensen et al.,  
167 2008; Campbell, Thaler, and Kessler, 2012), we found limited evidence that inbreeding  
168 altered physiological responses, as measured by shifts in the metabolome, to a novel  
169 common garden environment. We found no mating system effect on physiological  
170 plasticity through variation in the first two Principal Component (PC) axes, which together



171 explained more than 30% of variation in the metabolome, and only minor effects of  
172 inbreeding on variation in PC3 and PC5, which together explained just 10.1% of variation  
173 in the metabolome. Instead, the first two PCs (explaining 30% of variation in the  
174 metabolome) were strongly influenced by interactions between growing environment and  
175 time since transplantation. These results suggest that naturally inbred populations retain a  
176 similar physiological plasticity under different environmental conditions as outbred  
177 populations. Such a result contrasts with the effects of experimental inbreeding on  
178 important biosynthetic pathways related to specific stressors, such as anti-herbivore  
179 defense induction (Campbell, Thaler, and Kessler, 2012; Kariyat et al., 2012). One  
180 explanation for the absence of mating system effects in our study is that the common  
181 garden treatment (one month growing in late summer) was not stressful enough to detect  
182 inbreeding effects on stress-related processes (Murren and Dudash, 2012; Schou,  
183 Kristensen, and Loeschcke, 2015). This suggests that testing physiological responses to  
184 known stressors in *A. lyrata*, for example herbivores or pathogens, might reveal  
185 physiological costs to inbreeding. However, experimental evidence using *A. lyrata* from  
186 these same populations suggested no consistent negative effect of inbreeding on resistance  
187 to the pathogen *Albugo candida*, although the underlying physiological defense responses  
188 were not measured (Hoebe et al., 2011). Furthermore, the induction of defenses by  
189 generalist herbivores in *A. lyrata* was unaffected by population inbreeding status  
190 (Joschinski, van Kleunen, and Stift, 2015). We found no significant effects of mating  
191 system on variation in amounts of individual metabolites in either environment, with  
192 significant mating system by time interactions only observed for a small number of  
193 compounds. Rather, changes over time in the common garden, relative to the growth  
194 chamber, dominated the response of individual metabolites. Overall, the similarity of  
195 responses of individuals from inbreeding and outcrossing populations in our study suggests  
196 that the reduced heterozygosity resulting from multiple generations of selfing has not

197 compromised their ability to physiologically respond to contrasting environmental  
198 conditions.

199         The absence of effects of natural variation in mating system on plant physiology  
200 are perhaps expected, as the plant metabolome shows high plasticity under different  
201 growing environments (Brunetti et al., 2013). In our experiment, the plants grown in the  
202 outdoor common garden were exposed to a range of potential abiotic and biotic stressors,  
203 which are known to significantly alter the leaf metabolome (Sutter and Muller, 2011;  
204 Escobar-Bravo, Klinkhamer, and Leiss, 2017), often in ways specific to different stressors  
205 (Obata and Fernie, 2012). The observed changes in confidently-identified metabolites in  
206 our experiment are consistent with plants in the common garden responding to increased  
207 light intensity and levels of radiation, whereas plants in the growth chamber showed  
208 metabolic signatures of enhanced growth rates. Specifically, the common garden samples  
209 showed elevated levels of the vitamin ascorbate, a compound associated with UV-B  
210 tolerance (Wulff-Zottele et al., 2010; Kusano et al., 2011), as well as elevated levels of  
211 compounds linked to glycolysis (e.g. Glucose/Fructose -6-phosphate and Ribose-5-  
212 phosphate), and the TCA cycle (e.g. citrate, (S)-malate and succinate), suggesting elevated  
213 rates of photosynthesis (Wulff-Zottele et al., 2010). Conversely, the reduced levels of  
214 many important metabolites in growth chamber samples could reflect higher growth rates  
215 (e.g. Meyer et al., 2007), which is consistent with their higher rates of leaf production  
216 under controlled growth chamber conditions. Elevated growth rates in the growth chamber  
217 are also reflected in the elevated levels of amino acids in leaves in this growing  
218 environment, which is consistent with the higher levels of protein synthesis needed during  
219 growth (Hildebrandt et al., 2015). However, reduced amounts of amino acids in the  
220 common garden could also reflect resource constraints such as nitrogen availability (Obata  
221 and Fernie, 2012), although we used the same soil mix for both the common garden plot  
222 and growth chamber trays without additional fertiliser, so this seems unlikely to play a role  
223 in our experiment. Interestingly, statistical evidence for inbreeding effects on these highly

224 responsive compounds in the common garden was limited to the amino acid, L-  
225 Asparagine. To understand the adaptive nature of these divergent responses to different  
226 growing environments, additional controlled experiments would be necessary to identify  
227 the key stressors driving observed physiological changes.

228

229 ***Minor inbreeding effects on metabolite diversity under benign but not stressful***  
230 ***conditions***

231 Most metabolomic studies have used traditional multivariate approaches to  
232 interpret changes in metabolite composition (e.g. Davey et al., 2008; Kunin et al., 2009;  
233 Field and Lake, 2011). However, here we also estimated metabolite diversity using an  
234 approach based on changing the emphasis on the relative abundance across “species” using  
235 the parameter ‘q’ (Leinster and Cobbold, 2012). We found that inbreeding did not alter the  
236 total number of metabolites observed (equivalent to species richness,  $q = 0$ ) across growing  
237 environments and time. However, when less emphasis was placed on low abundance  
238 metabolites ( $q = 1$ ), inbred populations showed elevated metabolic diversity in the benign  
239 growth chamber environment relative to the common garden. This is consistent with  
240 inbreeding, specifically increased genome-wide homozygosity or exposure of deleterious  
241 alleles, having direct metabolic consequences (Pedersen, 1968; Cheptou and Donohue,  
242 2011; Reed et al., 2012), and supports the importance of the environmental context of  
243 inbreeding depression (Kristensen et al., 2008; Bijlsma and Loeschcke, 2012).  
244 Interestingly, experimentally inbred progeny from two self-incompatible *A. l. petraea*  
245 populations grown in a controlled environment also showed elevated expression of stress  
246 and photosynthesis related genes relative to outbred progeny (Menzel et al., 2015).  
247 Furthermore, inbred *Drosophila* lineages show changes to fundamental metabolic  
248 processes under both benign conditions and temperature stress (Pederson *et al.* 2008). It is  
249 therefore notable that mating system effects on metabolite diversity in our study were only  
250 observed in the constant growth chamber environment, and not in the outdoor common

251 garden. However, the similarity of outcrossing and inbreeding populations in metabolite  
252 diversity in the common garden suggests that while inbreeding populations could suffer  
253 from the effects of reduced genome-wide heterozygosity, consistent with the observation  
254 of increased heterosis in these populations in other studies (Willi, 2013; Oakley, Spoelhof,  
255 and Schemske, 2015), this has limited effects on their short-term physiological capacity to  
256 respond to new environments. Instead, the metabolomic response to the environmental  
257 conditions experienced in our common garden overwhelms the relatively minor effects of  
258 genome-wide reduced heterozygosity in *A. lyrata*.

259

## 260 **CONCLUSIONS**

261 Our results show that populations with a long history of inbreeding and associated  
262 reductions in genetic variation are not compromised in their ability to survive, reproduce  
263 and physiologically respond to a novel environment, at least relative to closely-related  
264 outcrossing populations. Such a finding could help to explain the general success of selfing  
265 lineages to colonise and adapt to a broad range of environments. The use of metabolomics  
266 to understand plastic physiological responses to novel environments and stressors offers  
267 promise for asking more specific questions linked to the understanding of the different type  
268 of pathways activated under a range of stressful conditions, as well as the impacts of  
269 genome-wide patterns of diversity on levels of metabolite diversity and plasticity.  
270 Together, these results offer new insights into the importance of intraspecific patterns of  
271 genetic variation for capacity to tolerate changing environmental conditions.

272

## 273 **ACKNOWLEDGEMENTS**

274 We thank Glasgow Polyomics for generating and help analysing the metabolomics data, as  
275 well as the Scottish Centre for Ecology and the Natural Environment for providing space  
276 for the common garden and David Fettes for preparing the experimental site. We thank

277 Natalie Hutchison who measured the length of fruits collected from the common garden.

278 The comments of several anonymous reviewers have helped to improve the manuscript.

279

## 280 **AUTHOR CONTRIBUTIONS**

281 JB and BKM designed the experiment. JB conducted the experiment, collected the data

282 and performed the metabolite extractions. JB, CC, RD, KB and BKM analysed the

283 metabolite data, and JB analysed the field data. JB and BKM wrote and revised the

284 manuscript. Funding from a Natural Environment Research Council grant to BKM

285 (NE/H021183/1)

286

## 287 **DATA ACCESSIBILITY STATEMENT**

288 We will make all data available on an online repository, such as Data Dryad, should the

289 manuscript be accepted for publication.

290

## 291 **SUPPORTING INFORMATION**

292 **Table S1:** Location of populations used in this study, around the North American Great

293 Lakes region, ordered by outcrossing rate (see Table S2).

294 **Table S2:** Details on the year of population sampling, population mating system variation,

295 genetic diversity and heterozygosity and sample sizes for the experiments.

296 **Table S3:** List of 109 confidently identified compounds and their average log-fold changes

297 between samples from the outdoor common garden and growth chamber at the initial pre-

298 transplant time point and one month after transplant.

299 **Figure S1:** Layout of experimental common garden, illustrating how samples and

300 populations were allocated to the plot.

301 **Figure S2:** Variation in temperature in the common garden field plot over the winter

302 period (1<sup>st</sup> Dec – 1<sup>st</sup> March 2012 and 2013).

303 **Figure S3:** Summary plots of variation in reproductive investment among populations of  
304 *Arabidopsis lyrata* with respect to their mating system classification. Populations are  
305 ordered by outcrossing rates.

306 **Figure S4:** Regression plots illustrating the interaction between different fitness-related  
307 traits and latitude for the individuals from outcrossing and inbreeding populations.

308 **Figure S5:** Visual differences in *Arabidopsis lyrata* growing in the growth chamber and  
309 common garden one month after transplanting.

310 **Figure S6:** Principal component analysis of metabolite variation among sample  
311 populations at time points 1 and 3 for the growth chamber and outdoor common garden set  
312 of plants.

313 **Figure S7:** Plots representing plasticity in different principal components of metabolite  
314 variation in *Arabidopsis lyrata*.

315 **Figure S8:** Three compounds that show clear differences between the growth chamber and  
316 common garden at time point 3, as well as significant interactions between mating system  
317 and growing environment.

318

319

320

## 321 **LITERATURE CITED**

322 AULD, J. R., AND R. A. RELYEA. 2010. Inbreeding depression in adaptive plasticity under  
323 predation risk in a freshwater snail. *Biol Lett* 6: 222-224.

324 BARRETT, S. C., R. I. COLAUTTI, AND C. G. ECKERT. 2008. Plant reproductive systems and  
325 evolution during biological invasion. *Mol Ecol* 17: 373-383.

326 BIJLSMA, R., AND V. LOESCHCKE. 2012. Genetic erosion impedes adaptive responses to  
327 stressful environments. *Evol Appl* 5: 117-129.

328 BRUNETTI, C., R. M. GEORGE, M. TATTINI, K. FIELD, AND M. P. DAVEY. 2013. Metabolomics in  
329 plant environmental physiology. *J Exp Bot* 64: 4011-4020.

330 BUCKLEY, J., E. KILBRIDE, V. CEVIK, J. G. VICENTE, E. B. HOLUB, AND B. K. MABLE. 2016. R-gene  
331 variation across *Arabidopsis lyrata* subspecies: effects of population structure,  
332 selection and mating system. *BMC Evol Biol* 16: 93.

333 CAMPBELL, S. A., J. S. THALER, AND A. KESSLER. 2012. Plant chemistry underlies  
334 herbivore-mediated inbreeding depression in nature. *Ecol Lett* 16: 252-260.

335 CAMPBELL, S. A., R. HALITSCHKE, J. S. THALER, AND A. KESSLER. 2014. Plant mating systems  
336 affect adaptive plasticity in response to herbivory. *Plant J* 78: 481-490.

- 337 CARLEIAL, S., M. VAN KLEUNEN, AND M. STIFT. 2017a. Relatively weak inbreeding  
338 depression in selfing but also in outcrossing populations of North American  
339 *Arabidopsis lyrata*. *J Evol Biol* 30: 1994-2004.
- 340 -----, 2017b. Small reductions in corolla size and pollen: ovule ratio, but no changes in  
341 flower shape in selfing populations of the North American *Arabidopsis lyrata*.  
342 *Oecologia* 183: 401-413.
- 343 CHARLESWORTH, D., AND B. CHARLESWORTH. 1987. Inbreeding depression and its  
344 evolutionary consequences. *Annual Review of Ecology, Evolution and*  
345 *Systematics* 18: 237-268.
- 346 CHEPTOU, P. O., AND K. DONOHUE. 2011. Environment-dependent inbreeding  
347 depression: its ecological and evolutionary significance. *New Phytol* 189: 395-  
348 407.
- 349 COLAUTTI, R. I., J. M. ALEXANDER, K. M. DLUGOSCH, S. R. KELLER, AND S. E. SULTAN. 2017.  
350 Invasions and extinctions through the looking glass of evolutionary ecology.  
351 *Philos Trans R Soc Lond B Biol Sci* 372.
- 352 CREEK, D. J., A. JANKEVICS, K. E. BURGESS, R. BREITLING, AND M. P. BARRETT. 2012. IDEOM:  
353 an Excel interface for analysis of LC-MS-based metabolomics data.  
354 *Bioinformatics* 28: 1048-1049.
- 355 DAVEY, M. P., F. I. WOODWARD, AND P. QUICK. 2008. Intraspecific variation in cold-  
356 temperature metabolic phenotypes of *Arabidopsis lyrata* ssp. *petraea*.  
357 *Metabolomics* 5: 138-149.
- 358 DAVEY, M. P., M. M. BURRELL, F. I. WOODWARD, AND W. P. QUICK. 2008. Population-specific  
359 metabolic phenotypes of *Arabidopsis lyrata* ssp. *petraea*. *New Phytol* 177: 380-  
360 388.
- 361 ECKERT, C. G., S. KALISZ, M. A. GEBER, R. SARGENT, E. ELLE, P. O. CHEPTOU, C. GOODWILLIE, et al.  
362 2010. Plant mating systems in a changing world. *Trends in Ecology and*  
363 *Evolution* 25: 35-43.
- 364 ESCOBAR-BRAVO, R., P. G. KLINKHAMER, AND K. A. LEISS. 2017. Interactive effects of UV-B  
365 light with abiotic factors on plant growth and chemistry, and their  
366 consequences for defense against arthropod herbivores. *Front Plant Sci* 8: 278.
- 367 FIELD, K. J., AND J. A. LAKE. 2011. Environmental metabolomics links genotype to  
368 phenotype and predicts genotype abundance in wild plant populations. *Physiol*  
369 *Plant* 142: 352-360.
- 370 FOXE, J. P., M. STIFT, A. TEDDER, A. HAUDRY, S. I. WRIGHT, AND B. K. MABLE. 2010.  
371 Reconstructing origins of loss of self-incompatibility and selfing in North  
372 American *Arabidopsis lyrata*: a population genetic context. *Evolution* 64: 3495-  
373 3510.
- 374 GLOAGUEN, Y., F. MORTON, R. DALY, R. GURDEN, S. ROGERS, J. WANDY, D. WILSON, et al. 2017.  
375 PiMP my metabolome: an integrated, web-based tool for LC-MS metabolomics  
376 data. *Bioinformatics* 33: 4007-4009.
- 377 GOLDBERG, E. E., J. R. KOHN, R. LANDE, K. A. ROBERTSON, S. A. SMITH, AND B. IGIC. 2010.  
378 Species selection maintains self-incompatibility. *Science* 330: 493-495.
- 379 HEDRICK, P. W., AND A. GARCIA-DORADO. 2016. Understanding inbreeding depression,  
380 purging, and genetic rescue. *Trends Ecol Evol* 31: 940-952.
- 381 HILDEBRANDT, T. M., A. NUNES NESI, W. L. ARAUJO, AND H. P. BRAUN. 2015. Amino acid  
382 catabolism in plants. *Mol Plant* 8: 1563-1579.
- 383 HOEBE, P. N. 2009. Evolutionary dynamics of mating systems in populations of North  
384 American *Arabidopsis lyrata*. . *PhD Thesis, University of Glasgow*.
- 385 HOEBE, P. N., M. STIFT, E. B. HOLUB, AND B. K. MABLE. 2011. The effect of mating system  
386 on growth of *Arabidopsis lyrata* in response to inoculation with the biotrophic  
387 parasite *Albugo candida*. *J Evol Biol* 24: 391-401.

- 388 HOFFMANN, A. A., C. M. SGRO, AND T. N. KRISTENSEN. 2017. Revisiting adaptive potential,  
389 population size, and conservation. *Trends Ecol Evol* 32: 506-517.
- 390 IGIC, B., R. LANDE, AND JOSHUA R. KOHN. 2008. Loss of self - incompatibility and its  
391 evolutionary consequences. *International Journal of Plant Sciences* 169: 93-  
392 104.
- 393 IVEY, C., D. CARR, AND M. EUBANKS. 2004. Effects of inbreeding in *Mimulus guttatus* on  
394 tolerance to herbivory in natural environments. *Ecology* 85: 567-574.
- 395 JOSCHINSKI, J., M. VAN KLEUNEN, AND M. STIFT. 2015. Costs associated with the evolution  
396 of selfing in North American populations of *Arabidopsis lyrata*. *Evolutionary  
397 Ecology* 29: 749-764.
- 398 KARIYAT, R. R., K. E. MAUCK, C. M. DE MORAES, A. G. STEPHENSON, AND M. C. MESCHER. 2012.  
399 Inbreeding alters volatile signalling phenotypes and influences tri-trophic  
400 interactions in horsenettle (*Solanum carolinense* L.). *Ecol Lett* 15: 301-309.
- 401 KELLER, L. F., AND D. M. WALLER. 2002. Inbreeding effects in wild populations. *Trends  
402 in Ecology and Evolution* 17: 230-241.
- 403 KRISTENSEN, T. N., J. S. BARKER, K. S. PEDERSEN, AND V. LOESCHCKE. 2008. Extreme  
404 temperatures increase the deleterious consequences of inbreeding under  
405 laboratory and semi-natural conditions. *Proc Biol Sci* 275: 2055-2061.
- 406 KRISTENSEN, T. N., K. S. PEDERSEN, C. J. VERMEULEN, AND V. LOESCHCKE. 2010. Research on  
407 inbreeding in the 'omic' era. *Trends Ecol Evol* 25: 44-52.
- 408 KUNIN, W. E., P. VERGEER, T. KENTA, M. P. DAVEY, T. BURKE, F. I. WOODWARD, P. QUICK, et al.  
409 2009. Variation at range margins across multiple spatial scales: environmental  
410 temperature, population genetics and metabolomic phenotype. *Proc Biol Sci*  
411 276: 1495-1506.
- 412 KUSANO, M., T. TOHGE, A. FUKUSHIMA, M. KOBAYASHI, N. HAYASHI, H. OTSUKI, Y. KONDOU, et al.  
413 2011. Metabolomics reveals comprehensive reprogramming involving two  
414 independent metabolic responses of *Arabidopsis* to UV-B light. *Plant J* 67: 354-  
415 369.
- 416 LEINSTER, T., AND C. COBBOLD. 2012. Measuring diversity: the importance of species  
417 similarity. *Ecology* 93: 477-489.
- 418 MABLE, B. K., AND A. ADAM. 2007. Patterns of genetic diversity in outcrossing and  
419 selfing populations of *Arabidopsis lyrata*. *Mol Ecol* 16: 3565-3580.
- 420 MABLE, B. K., A. V. ROBERTSON, S. DART, C. DI BERARDO, AND L. WITHAM. 2005. Breakdown  
421 of self-incompatibility in the perennial *Arabidopsis lyrata* (Brassicaceae) and  
422 its genetic consequences. *Evolution* 59: 1437-1448.
- 423 MATTILA, T. M., J. TYRMI, T. PYHÄJÄRVI, AND O. SAVOLAINEN. 2017. Genome-Wide Analysis  
424 of Colonization History and Concomitant Selection in *Arabidopsis lyrata*.  
425 *Molecular Biology and Evolution* 10.1093/molbev/msx193 DOI.
- 426 MENZEL, M., N. SLETVOLD, J. AGREN, AND B. HANSSON. 2015. Inbreeding affects gene  
427 expression differently in two self-incompatible *Arabidopsis lyrata* populations  
428 with similar levels of inbreeding depression. *Mol Biol Evol* 32: 2036-2047.
- 429 MEYER, R. C., M. STEINFATH, J. LISEC, M. BECHER, H. WITUCKA-WALL, O. TORJEK, O. FIEHN, et al.  
430 2007. The metabolic signature related to high plant growth rate in *Arabidopsis  
431 thaliana*. *Proc Natl Acad Sci U S A* 104: 4759-4764.
- 432 MURREN, C. J., AND M. R. DUDASH. 2012. Variation in inbreeding depression and  
433 plasticity across native and non-native field environments. *Ann Bot* 109: 621-  
434 632.
- 435 O'BRIEN, S. J. 1994. A role for molecular genetics in biological conservation. *Proc Natl  
436 Acad Sci U S A* 91: 5748-5755.
- 437 O'HALLORAN, L., AND D. CARR. 2010. Phenotypic plasticity and inbreeding depression in  
438 *Mimulus ringens* (Phrymaceae). *Evol Ecol Res* 12: 617-632.



- 439 OAKLEY, C. G., J. P. SPOELHOF, AND D. W. SCHEMSKE. 2015. Increased heterosis in selfing  
440 populations of a perennial forb. *AoB Plants* 7.
- 441 OBATA, T., AND A. R. FERNIE. 2012. The use of metabolomics to dissect plant responses  
442 to abiotic stresses. *Cell. Mol. Life. Sci.* 69: 3225-3243.
- 443 PAIGE, K. 2010. The functional genomics of inbreeding depression - a new approach to  
444 an old problem. *BioScience* 60: 267-277.
- 445 PEDERSEN, D. G. 1968. Environmental stress, heterozygote advantage and genotype-  
446 environment interaction in *Arabidopsis*. *Heredity (Edinb)* 23: 127-138.
- 447 PEDERSEN, K. S., T. N. KRISTENSEN, V. LOESCHCKE, B. O. PETERSEN, J. O. DUUS, N. C. NIELSEN,  
448 AND A. MALMENDAL. 2008. Metabolomic signatures of inbreeding at benign and  
449 stressful temperatures in *Drosophila melanogaster*. *Genetics* 180: 1233-1243.
- 450 RAZANAJATOVO, M., N. MAUREL, W. DAWSON, F. ESSL, H. KREFT, J. PERGL, P. PYSEK, et al. 2016.  
451 Plants capable of selfing are more likely to become naturalized. *Nat Commun* 7:  
452 13313.
- 453 REED, D. H., C. W. FOX, L. S. ENDERS, AND T. N. KRISTENSEN. 2012. Inbreeding-stress  
454 interactions: evolutionary and conservation consequences. *Ann N Y Acad Sci*  
455 1256: 33-48.
- 456 RONCE, O., F. H. SHAW, F. ROUSSET, AND R. G. SHAW. 2009. Is inbreeding depression lower  
457 in maladapted populations? A quantitative genetics model. *Evolution* 63: 1807-  
458 1819.
- 459 ROSS-IBARRA, J., S. I. WRIGHT, J. P. FOXE, A. KAWABE, L. DEROSE-WILSON, G. GOS, D.  
460 CHARLESWORTH, AND B. S. GAUT. 2008. Patterns of polymorphism and  
461 demographic history in natural populations of *Arabidopsis lyrata*. *PLoS One* 3.
- 462 SCHELTEMA, R. A., A. JANKEVICS, R. C. JANSEN, M. A. SWERTZ, AND R. BREITLING. 2011.  
463 PeakML/mzMatch: a file format, Java library, R library, and tool-chain for mass  
464 spectrometry data analysis. *Anal Chem* 83: 2786-2793.
- 465 SCHLICHTLING, C., AND D. LEVIN. 1986. Effects of inbreeding on phenotypic plasticity in  
466 cultivated *Phlox*. *Theoretical Applied Genetics* 72: 114-119.
- 467 SCHOU, M. F., T. N. KRISTENSEN, AND V. LOESCHCKE. 2015. Trait-specific consequences of  
468 inbreeding on adaptive phenotypic plasticity. *Ecol Evol* 5: 1-6.
- 469 SICARD, A., AND M. LENHARD. 2011. The selfing syndrome: a model for studying the  
470 genetic and evolutionary basis of morphological adaptation in plants. *Ann Bot*  
471 107: 1433-1443.
- 472 SLETVOLD, N., M. MOUSSET, J. HAGENBLAD, B. HANSSON, AND J. AGREN. 2013. Strong  
473 inbreeding depression in two Scandinavian populations of the self-  
474 incompatible perennial herb *Arabidopsis lyrata*. *Evolution* 67: 2876-2888.
- 475 STIFT, M., B. D. HUNTER, B. SHAW, A. ADAM, P. N. HOEBE, AND B. K. MABLE. 2013. Inbreeding  
476 depression in self-incompatible North-American *Arabidopsis lyrata*:  
477 disentangling genomic and S-locus-specific genetic load. *Heredity (Edinb)* 110:  
478 19-28.
- 479 SUTTER, R., AND C. MULLER. 2011. Mining for treatment-specific and general changes in  
480 target compounds and metabolic fingerprints in response to herbivory and  
481 phytohormones in *Plantago lanceolata*. *New Phytol* 191: 1069-1082.
- 482 SWILLEN, I., J. VANOVERBEKE, AND L. DE MEESTER. 2015. Inbreeding and adaptive  
483 plasticity: an experimental analysis on predator-induced responses in the  
484 water flea *Daphnia*. *Ecol Evol* 5: 2712-2721.
- 485 TEDDER, A., S. CARLEIAL, M. GOLEBIEWSKA, C. KAPPEL, K. K. SHIMIZU, AND M. STIFT. 2015.  
486 Evolution of the Selfing Syndrome in *Arabis alpina* (Brassicaceae). *PLoS One*  
487 10: e0126618.
- 488 VAN KLEUNEN, M., J. C. MANNING, V. PASQUALETTO, AND S. D. JOHNSON. 2008.  
489 Phylogenetically independent associations between autonomous self-  
490 fertilization and plant invasiveness. *Am Nat* 171: 195-201.

- 491 WHITLOCK, R. 2014. Relationships between adaptive and neutral genetic diversity and  
492 ecological structure and functioning: a meta-analysis. *J Ecol* 102: 857-872.
- 493 WILLI, Y. 2013. Mutational meltdown in selfing *Arabidopsis lyrata*. *Evolution* 67: 806-  
494 815.
- 495 WILLOUGHBY, J. R., A. M. HARDER, J. A. TENNESSEN, K. T. SCRIBNER, AND M. R. CHRISTIE. 2018.  
496 Rapid genetic adaptation to a novel environment despite a genome-wide  
497 reduction in genetic diversity. *Mol Ecol* 10.1111/mec.14726 DOI.
- 498 WRIGHT, S. I., S. KALISZ, AND T. SLOTTE. 2013. Evolutionary consequences of self-  
499 fertilization in plants. *Proceedings of the Royal Society Series B* 280: 20130133.
- 500 WULFF-ZOTTELE, C., N. GATZKE, J. KOPKA, A. ORELLANA, R. HOEFGEN, J. FISAHN, AND H. HESSE.  
501 2010. Photosynthesis and metabolism interact during acclimation of  
502 *Arabidopsis thaliana* to high irradiance and sulphur depletion. *Plant Cell*  
503 *Environ* 33: 1974-1988.
- 504
- 505
- 506
